# Supplementary material for: A new strategy for highly efficient single-drop microextraction with a liquid–gas compound pendant drop
Source: Royal Society of Chemistry journal article supplement (doi:10.1039/c4an00033a), 2014-01-01

## Supporting Information

### **A new strategy for highly efficient single-drop microextraction with liquid-gas compound pendant drop**

Hai-Yang Xie<sup>1</sup>, Jian Yan<sup>1,2</sup>, Liu-Yin Fan<sup>1</sup>, Sharmin Jahan<sup>1</sup>, Ran Zhong<sup>1</sup>, Xin-Qiao Jin<sup>2</sup> and

Cheng-Xi Cao\*<sup>1</sup>

<sup>1</sup> *Laboratory of Analytical Biochemistry and Bio-separation, State Key Laboratory of Microbial Metabolism, School of Life Science and Biotechnology, Shanghai Jiao Tong University, Shanghai, 200240, China*

<sup>2</sup> *Institute of Refrigeration and Cryogenics, School of Mechanical Engineering, Shanghai Jiao Tong University, Shanghai 200240, China*

Corresponding Author: Cheng-Xi Cao

Tel: +86 21-3420 5682; Fax: +86 21-3420 5820

E-mail: [cxcao@sjtu.edu.cn](mailto:cxcao@sjtu.edu.cn);

**GC/MS conditions:** The mass spectrometric detector was operated in the electron ionization (EI) mode with an ionizing energy of 70eV; the ion source temperature of 230 °C, and a quadrupole temperature of 150 °C. Data acquisition was carried out in the selected ion monitoring (SIM) mode with a solvent delay of 4min. Each compound was confirmed by its retention time and the identification of four selected ions and was quantified on the basis of the peak area using the quantitative ions.

---

**Table S1. Retention times and selected ions of pesticides**

| Pesticide        | t <sub>R</sub> (min) | Selected ions (m/z) | Quantitative ion (m/z) | Molecular weight |
|------------------|----------------------|---------------------|------------------------|------------------|
| Parathion-methyl | 7.414                | 79, 109, 125, 263   | 109                    | 263.2            |
| Chlorpyrifos     | 7.730                | 97, 197, 286, 314   | 97                     | 350.5            |
| Bifenthrin       | 9.372                | 141, 165, 181, 422  | 181                    | 422.9            |
| Fenpropathrin    | 9.461                | 91, 181, 265, 334   | 181                    | 349.4            |

---

**Figure S1.** The influence of several variables on the liquid-gas CPD microextraction: (A) organic solvent (toluene, chlorobenzene and chloroform), (B) stirring rate (0-700rpm), and (C) extraction time (0-240s). Experimental conditions: 1  $\mu$ L drop of chlorobenzene containing 1  $\mu$ L air bubble, and 25  $^{\circ}$ C.

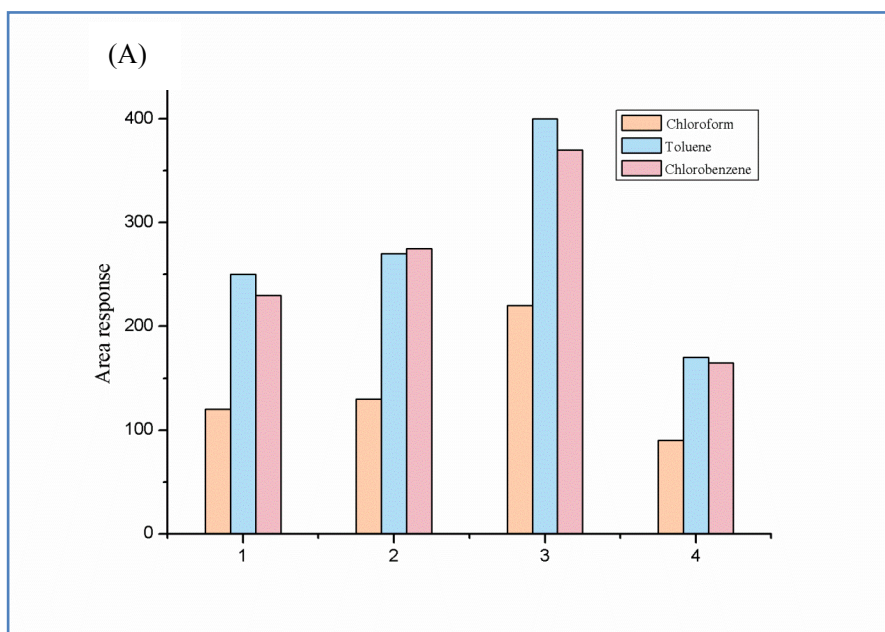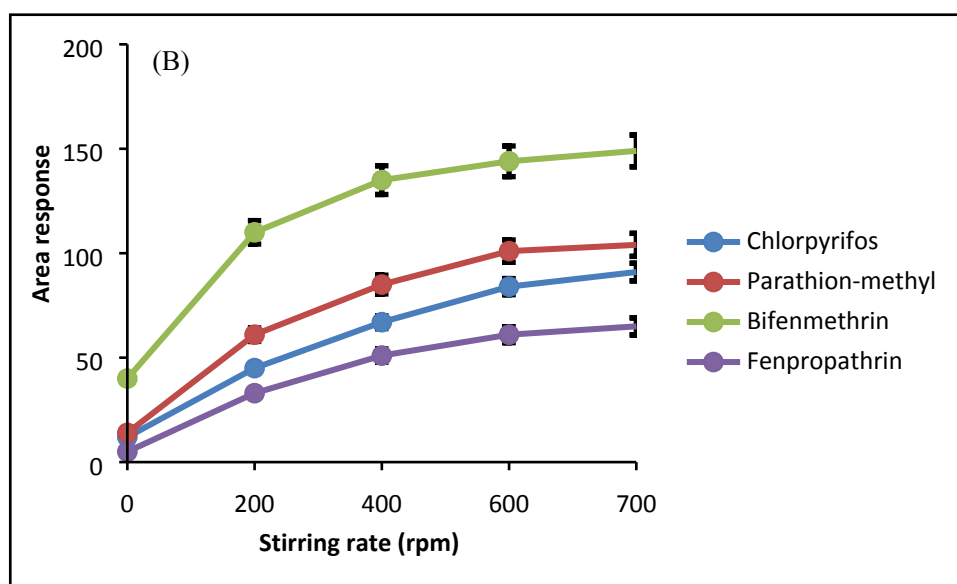

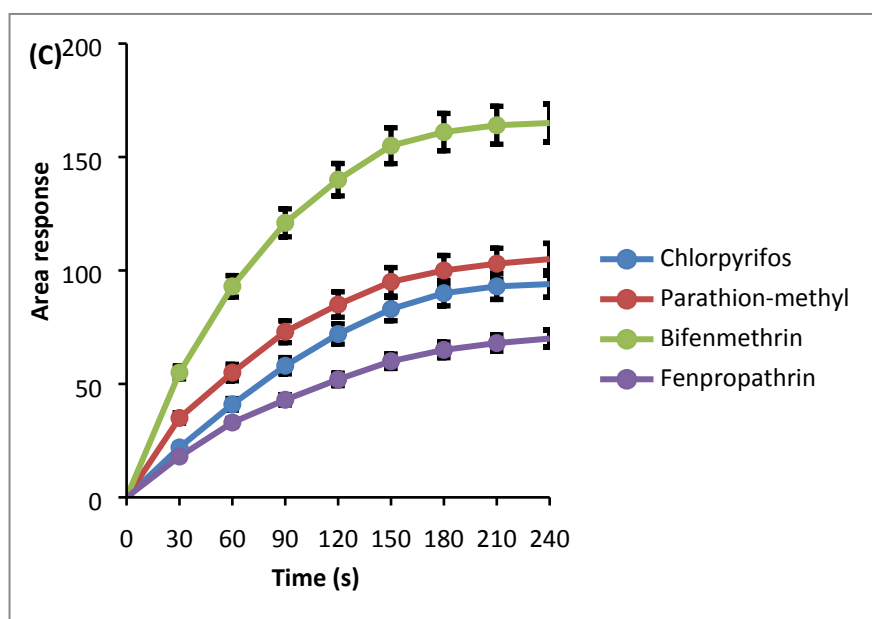

**Figure S2.** Photograph of a 1  $\mu\text{L}$  drop of chlorobenzene containing 1  $\mu\text{L}$  air bubble in (A) 5% NaCl solution (m/v), (B) 10% NaCl solution (m/v), (C) 20% NaCl solution (m/v), and (D) 30% NaCl solution (m/v).

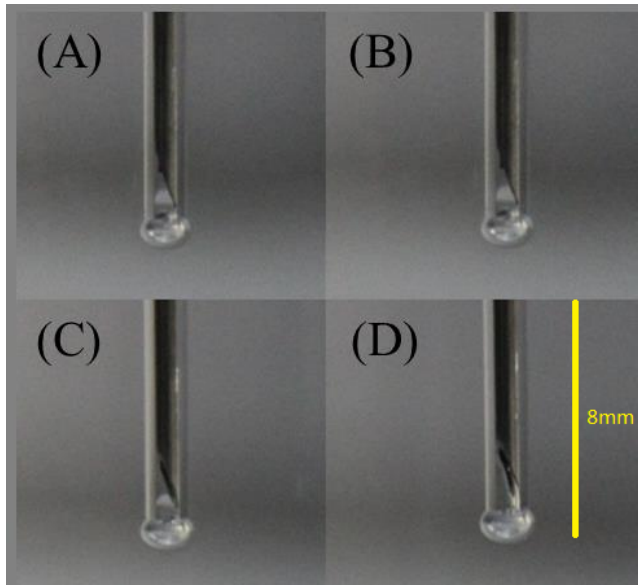

Supplement: c4an00033a1.pdf [file c4an00033a1.pdf]
